# Supplementary material for: CYP1A2 Genetic Variation, Coffee Intake, and Kidney Dysfunction
Source: PubMed Central journal article supplement (PMC9880799; doi:10.1001/jamanetworkopen.2022.47868), 2023-01-26
Supplement: jamanetwopen-e2247868-s002.pdf [file jamanetwopen-e2247868-s002.pdf]

## **Data Sharing Statement**

### **Data**

**Data available:** Yes

**Data types:** Deidentified participant data

**How to access data:** Data can be requested by emailing the corresponding author at [a.el.sohemy@utoronto.ca](mailto:a.el.sohemy@utoronto.ca)

**When available:** With publication

### **Supporting Documents**

**Document types:** None

### **Additional Information**

**Who can access the data:** Researchers whose proposed use of the data has been approved.

**Types of analyses:** For specified purposes

**Mechanisms of data availability:** After approval of proposal with a signed data access agreement and with investigator support.
